# Supplementary material for: Kilometre-scale simulations over Fennoscandia reveal a large loss of tundra due to climate warming
Source: Copernicus journal article supplement (doi:10.5194/bg-21-1093-2024), 2024-03-05
Supplement: Supplementary file 1 [file bg-21-1093-2024-supplement.pdf]

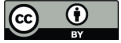

*Supplement of*

## **Kilometre-scale simulations over Fennoscandia reveal a large loss of tundra due to climate warming**

**Fredrik Lagergren et al.**

*Correspondence to:* Fredrik Lagergren ([fredrik.lagergren@nateko.lu.se](mailto:fredrik.lagergren@nateko.lu.se))

The copyright of individual parts of the supplement might differ from the article licence.

# Content

|                                                                                      | Page  |
|--------------------------------------------------------------------------------------|-------|
| S1. Maps of hotspots                                                                 | 2     |
| S2. LPJ-Guess parameters tuned for the IBS plant functional type                     | 3-4   |
| S3. Description of the reindeer grazing, browsing and trampling implementation       | 5-7   |
| S4. Climate-change signal in the climate scenario                                    | 8     |
| S5. Description of conversion of PFT LAI to vegetation classes                       | 9-10  |
| S6. Validation results                                                               | 11-13 |
| S7. Confusion matrixes for simulated and satellite-based vegetation classes:         |       |
| a. Abisko                                                                            | 14    |
| b. Vindeln                                                                           | 15    |
| c. Helags                                                                            | 16    |
| d. Fulu                                                                              | 17    |
| e. Muddus                                                                            | 18    |
| f. Björnlandet                                                                       | 19    |
| S8. Simulated potential reindeer consumption in Swedish reindeer-herding communities | 20-21 |

## S1. Maps of hotspots

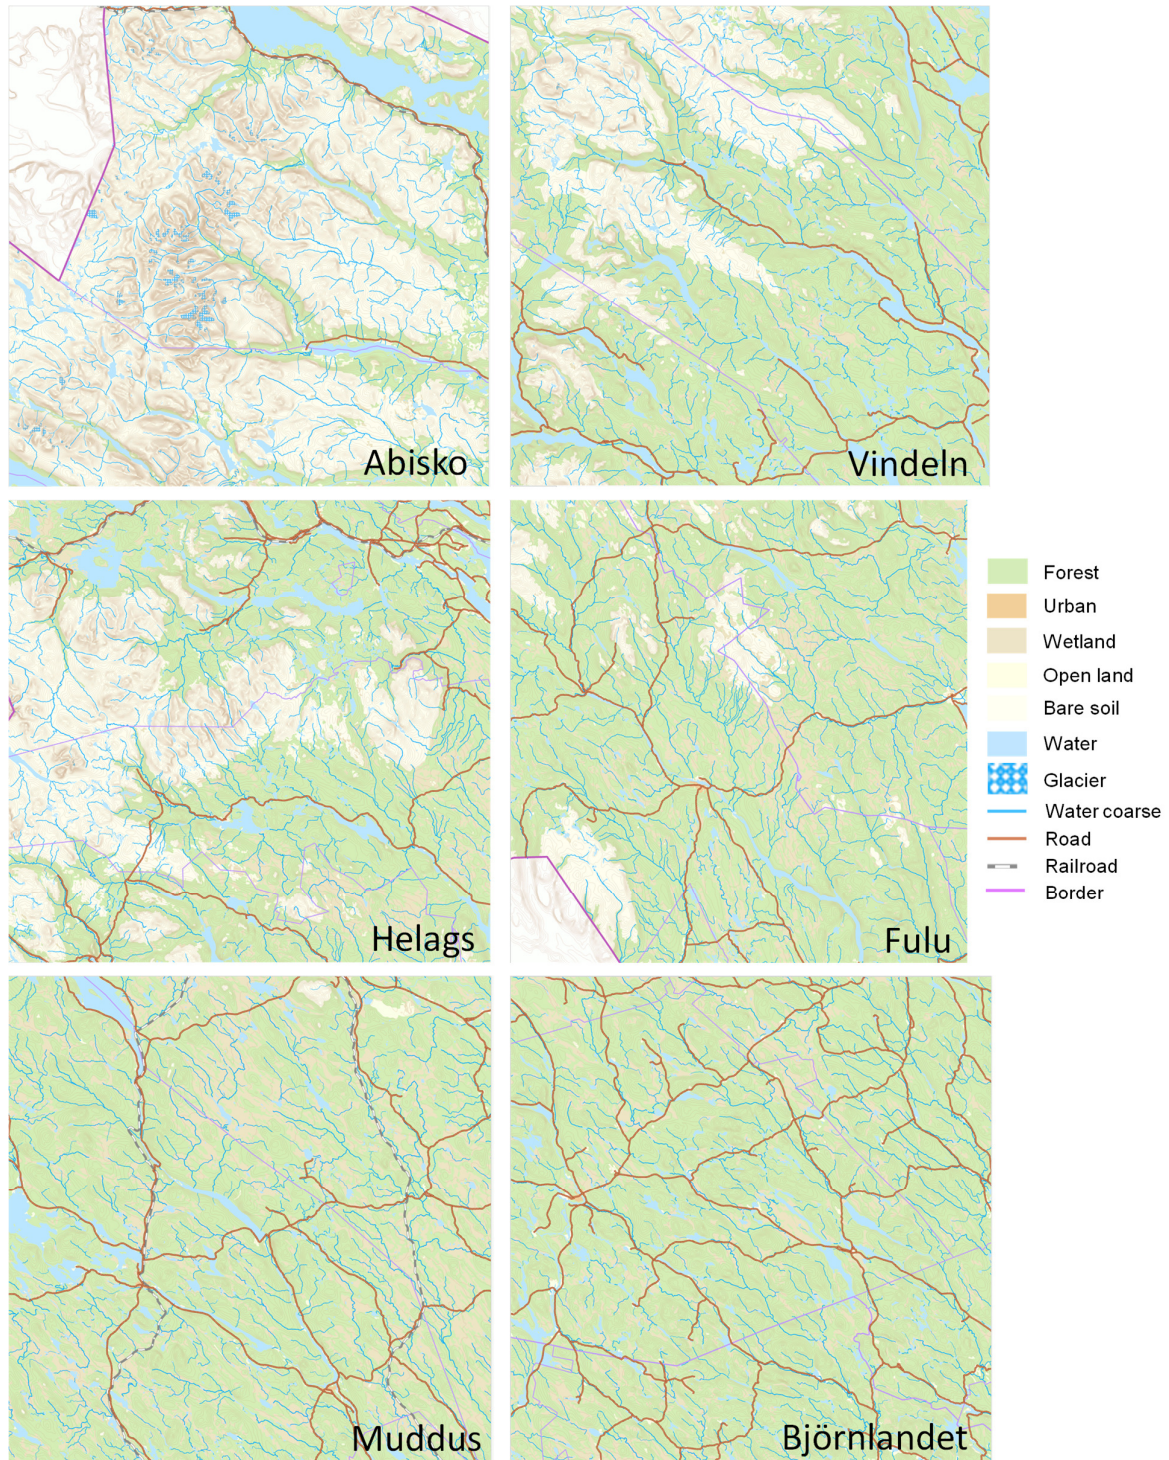

**Figure S1.** Maps of the six hotspots (90 × 90 km) from Lantmäteriet (The overview map, open data license Creative Commons, (CC0), <https://www.lantmateriet.se/en/>, accessed 2021-09-09).

## S2. LPJ-Guess parameters tuned for the IBS plant functional type

Using the default parameters, test runs with a sub sample of gridcells showed a substantial underestimation of deciduous broad-leafed forest adjacent to the mountains, where it is represented by the Shade-Intolerant Broadleaved Summergreen tree plant functional type (IBS) in the simulations, when compared to the satellite-based products (see section 2.5.1). We therefore tested the IBS parameters from Gustafson et al. (2021), who had adjusted them to more specifically represent the small tree mountain birch (*Betula pubescens* ssp. *tortuosa*) and calibrated it to grow and compete as expected for the Abisko area (Gustafson personal communication). Simulations with these parameters on the other hand resulted in too large an extent of deciduous broad-leafed forest so to reduce the competitiveness of IBS, the original values related to shade tolerance and turnover were used instead. For the same reason, we also adjusted the `alphar` and `turnover_sap` parameters.

**Table S2.** Selected parameters for the shade-Intolerant Broadleaved Summergreen tree plant functional type (IBS), which represents the mountain birch (*Betula pubescens* ssp. *tortuosa*). The columns show the values which differ in the original LPJ-Guess 4.1, the version used by Gustafson et al. (2021) and the version used in the present application.

| Parameter                  | Default 4.1 | Gustafson et al. (2021) | Used value | Unit                                  | Explanation                                                                                           |
|----------------------------|-------------|-------------------------|------------|---------------------------------------|-------------------------------------------------------------------------------------------------------|
| <code>alphar</code>        | 11          | 3                       | 5          | -                                     | Shape parameter capturing non-linearity in recruitment rate relative to understory growing conditions |
| <code>turnover_sap</code>  | 0.1         | 0.1                     | 0.075      | fraction/year                         | Sapwood turnover                                                                                      |
| <code>crownarea_max</code> | 50          | 27.3                    | 27.3       | m <sup>2</sup>                        | Maximum tree crown area                                                                               |
| <code>k_latosa</code>      | 6000        | 4000                    | 4000       | -                                     | Leaf to sapwood area ratio                                                                            |
| <code>k_allom1</code>      | 250         | 200                     | 200        |                                       | Allometric parameter (crownarea = $k\_allom1 \times diam^{1.6}$ )                                     |
| <code>k_allom2</code>      | 60          | 30                      | 30         |                                       | Allometric parameter (height = $k\_allom2 \times diameter^{0.6}$ )                                    |
| <code>gdd5min_est</code>   | 350         | 250                     | 250        | °C day                                | Minimum growing degree days for establishment, with 5 °C limit                                        |
| <code>phengdd5ramp</code>  | 200         | 75                      | 75         | °C day                                | Growing degree days, with 5 °C limit, to attain full leaf cover                                       |
| <code>gdd0_min</code>      | 0           | 450                     | 450        | °C day                                | Minimum growing degree days for establishment, with 0 °C limit                                        |
| <code>longevity</code>     | 300         | 220                     | 220        | years                                 | Expected lifetime longevity under non-stressed conditions                                             |
| <code>greff_min</code>     | 0.09        | 0.04                    | 0.09       | kg C m <sup>-2</sup> yr <sup>-1</sup> | Threshold for growth suppression mortality                                                            |
| <code>parff_min</code>     | 2500000     | 2000000                 | 2500000    | J m <sup>-2</sup> day <sup>-1</sup>   | Min forest floor PAR for grass growth/ tree establishment                                             |
| <code>turnover_root</code> | 0.7         | 0.6                     | 0.7        | years                                 | Turnover rate for fine roots                                                                          |
| <code>leaflong</code>      | 0.5         | 0.3                     | 0.5        | years                                 | Leaf life span                                                                                        |

Gustafson, A., Miller, P. A., Björk, R., Olin, S., and Smith, B.: Nitrogen restricts future sub-arctic treeline advance in an individual-based dynamic vegetation model, *Biogeosciences*, 18, 6329–6347, <https://doi.org/10.5194/bg-18-6329-2021>, 2021.

### S3. Description of the reindeer grazing, browsing and trampling implementation

A new function (grazebrowse), which reduces leaf biomass and kills a fraction of the plants, was added to LPJ-Guess code to represent reindeer grazing/browsing and trampling. The reduction of leaf biomass was done for all cohorts at patch level with a specified interval (`visit_int`, set to three years) after a check that the cohort is below a height that enables reindeer access to its canopy (`height_max`, set to 2.5 m). Using numbers for Sweden for verification, a three-year `visit_int` can be motivated from the size of the Swedish land area with reindeer herding (225 000 km<sup>2</sup>, [www.sametinget.se/rennaring\\_sverige](http://www.sametinget.se/rennaring_sverige)), the population (225 000 – 280 000 animals in winter, [www.sametinget.se/rennaring\\_sverige](http://www.sametinget.se/rennaring_sverige)), the area represented by a patch (1000 m<sup>2</sup>) and assuming that an animal eats one day a year per visited patch, which gives roughly a return time of 2-3 years ( $225 \times 10^9 \text{ m}^2 / (250 \times 10^3 \text{ animals} \times 1000 \text{ m}^2 \text{ patch}^{-1} \times 1 \text{ patch day}^{-1} \text{ animal}^{-1} \times 365 \text{ days year}^{-1}) = 2.5 \text{ years}$ ). The fraction of the leaf biomass that is consumed in a year with reindeers visiting the patch (`harv_frac`, unitless) was calculated as:

$$\text{harv\_frac} = \text{visit\_int} \times \text{browse\_pref} \times \text{herbivore\_int}$$

where `browse_pref` (unitless) is a PFT specific parameter that describes how large the fraction of a PFT that is consumed is relative to the availability of the PFT and the total consumption, and where `herbivore_int` (yr<sup>-1</sup>) is the relative herbivore intensity (i.e. the fraction of leaf mass on average removed per year, if it is reachable, with a `browse_pref` of 1). Preference values for reindeer were obtained from extensive observations of Caribou grazing and browsing in Canada (Denryter et al., 2017) (Table 1). Though the species are different in North America compared to Fennoscandia, it was assumed that the North American species were representative at the genus level.

All consumed carbon of the browsed leaves entered the harvest pool, which means that it was removed from the biogeochemical cycling within the ecosystem, but only a fraction of the consumed leaf N was “harvested” (`N_browseharvest_scale`, set to 0.35). The remaining part of consumed N was maintained in the cohort’s leaf N pool, which is a functionality that represents the assumption that N leaving the herbivore as urine is rapidly taken up by the plants (Barthelemy et al., 2018). Ferraro et al. (2022), in their modelling study of caribou population dynamics, used a fraction of 38% of N that is released as egestion the day after consumption and that some of the remaining part is released as excretion based on the range (e.g., varying with age and sex) reported by Mcewan and Whitehead (1970).

A fraction of the biomass (grass PFT types) or number of individuals (tree and shrub PFTs) was killed annually to represent the effect of trampling. The fraction (`trampled`) was calculated as:

$$\text{trampled} = \text{visit\_int} \times \text{tramp\_frac} \times \text{herbivore\_int}$$

where `tramp_frac` (unitless) is a PFT specific parameter corresponding to the fraction of individuals killed (or biomass killed for grass) per year with a `herbivore_int` of 1. A maximum value of `trampled` is currently set to 95%. The “`tramp_frac`” values (Table 1) are based on the vegetation response in an artificial trampling experiment (Egelkraut et al., 2020).

**Table S3.** The new PFT-parameters browse\_pref and tramp\_frac. The browse\_pref values are based on the Denryter et al. (2017) study. An average of reported Ivlev's electivity indexes (IEI) was first achieved from reported values for relevant individual species and then "preference" was calculated as  $(1 + IEI)/(1 - IEI)$ .

| pft             | Species used for calculating the mean of Ivlev's electivity indexes                                                                           | IEI    | browse_pref | tramp_frac |
|-----------------|-----------------------------------------------------------------------------------------------------------------------------------------------|--------|-------------|------------|
| BNE             | <i>Picea mariana</i> , <i>P. glauca</i> , <i>P. Engelmannii</i>                                                                               | -0.9   | 0.053       | 0          |
| BINE            | <i>Pinus contorta</i>                                                                                                                         | -0.94  | 0.031       | 0          |
| IBS             | <i>Betula papyrifera</i> (0.82), <i>Populus tremuloides</i> (0.44), <i>Alnus crispa</i> (0.66)                                                | 0.64   | 4.6         | 0          |
| TeBS            | No data                                                                                                                                       | 0.5    | 3.0         | 0          |
| C3G,<br>C3G_wet | Weighted mean of all grasses (weighted by number of observed grazing events for the different species)                                        | -0.176 | 0.70        | 0.1        |
| HSE             | <i>Juniperus communis</i> (-1)                                                                                                                | -0.99  | 0.005       | 0.01       |
| HSS             | <i>Alnus crispa</i> (0.66), <i>Salix</i> sp (0.72), <i>Betula glandulosa</i> (0.4)                                                            | 0.65   | 4.7         | 0.01       |
| LSE,<br>pLSE    | <i>Vaccinium vitis-idea</i> , <i>Empetrum</i> has higher score but that is because its berries are eaten                                      | -0.72  | 0.16        | 0.15       |
| LSS,<br>pLSS    | <i>Vaccinium myrtilloides</i> (0.65), <i>Vaccinium uliginosum</i> (0.59), <i>Salix</i> sp (0.72)                                              | 0.65   | 4.7         | 0.15       |
| GRT,<br>WetGRS  | Calculated from Table 2&3 for forbes, grasses and graminoid nongrasses                                                                        | -0.2   | 0.67        | 0.1        |
| EPDS            | <i>Vaccinium oxycoccus</i> (-0.88), <i>Cassiope mertensiana</i> (-0.67), <i>Dryas octopetala</i> (-0.28), <i>Saxifraga oppositifolia</i> (-1) | -0.71  | 0.17        | 0.2        |
| SPDS            | <i>Salix reticulata</i> (-0.82), <i>Arctostaphylos rubra</i> (-0.26)                                                                          | -0.54  | 0.30        | 0.2        |
| CLM,<br>pCLM    | <i>Saxifragaceae</i> (-1), <i>Caryophyllaceae</i> (-0.9), lichens<br><i>Cladina</i> and <i>Cladonia</i> sp (0.55), mosses (-1)                | -0.59  | 0.26        | 0.1        |
| pmoss           | Various spp.                                                                                                                                  | -1     | 0.0         | 0.1        |

## References

- Barthelemy, H., Stark, S., Michelsen, A., and Olofsson, J.: Urine is an important nitrogen source for plants irrespective of vegetation composition in an Arctic tundra: Insights from a N-15-enriched urea tracer experiment, *Journal of Ecology*, 106, 367-378, <https://doi.org/10.1111/1365-2745.12820>, 2018.
- Denryter, K. A., Cook, R. C., Cook, J. G., and Parker, K. L.: Straight from the caribou's (*Rangifer tarandus*) mouth: detailed observations of tame caribou reveal new insights into summer-autumn diets, *Canadian Journal of Zoology*, 95, 81-94, <https://doi.org/10.1139/cjz-2016-0114>, 2017.
- Egelkraut, D., Barthelemy, H., and Olofsson, J.: Reindeer trampling promotes vegetation changes in tundra heathlands: Results from a simulation experiment, *Journal of Vegetation Science*, 31, 476-486, <https://doi.org/10.1111/jvs.12871>, 2020.
- Ferraro, K. M., Schmitz, O. J., and McCary, M. A.: Effects of ungulate density and sociality on landscape heterogeneity: a mechanistic modeling approach, *Ecography*, 2022, e06039, <https://doi.org/10.1111/ecog.06039>, 2022.

McEwan, E. H. and Whitehead, P. E.: Seasonal changes in the energy and nitrogen intake in reindeer and caribou, *Canadian Journal of Zoology*, 48, 905-913, <https://doi.org/10.1139/z70-164>, 1970.



## S4. Climate-change signal in the climate scenario

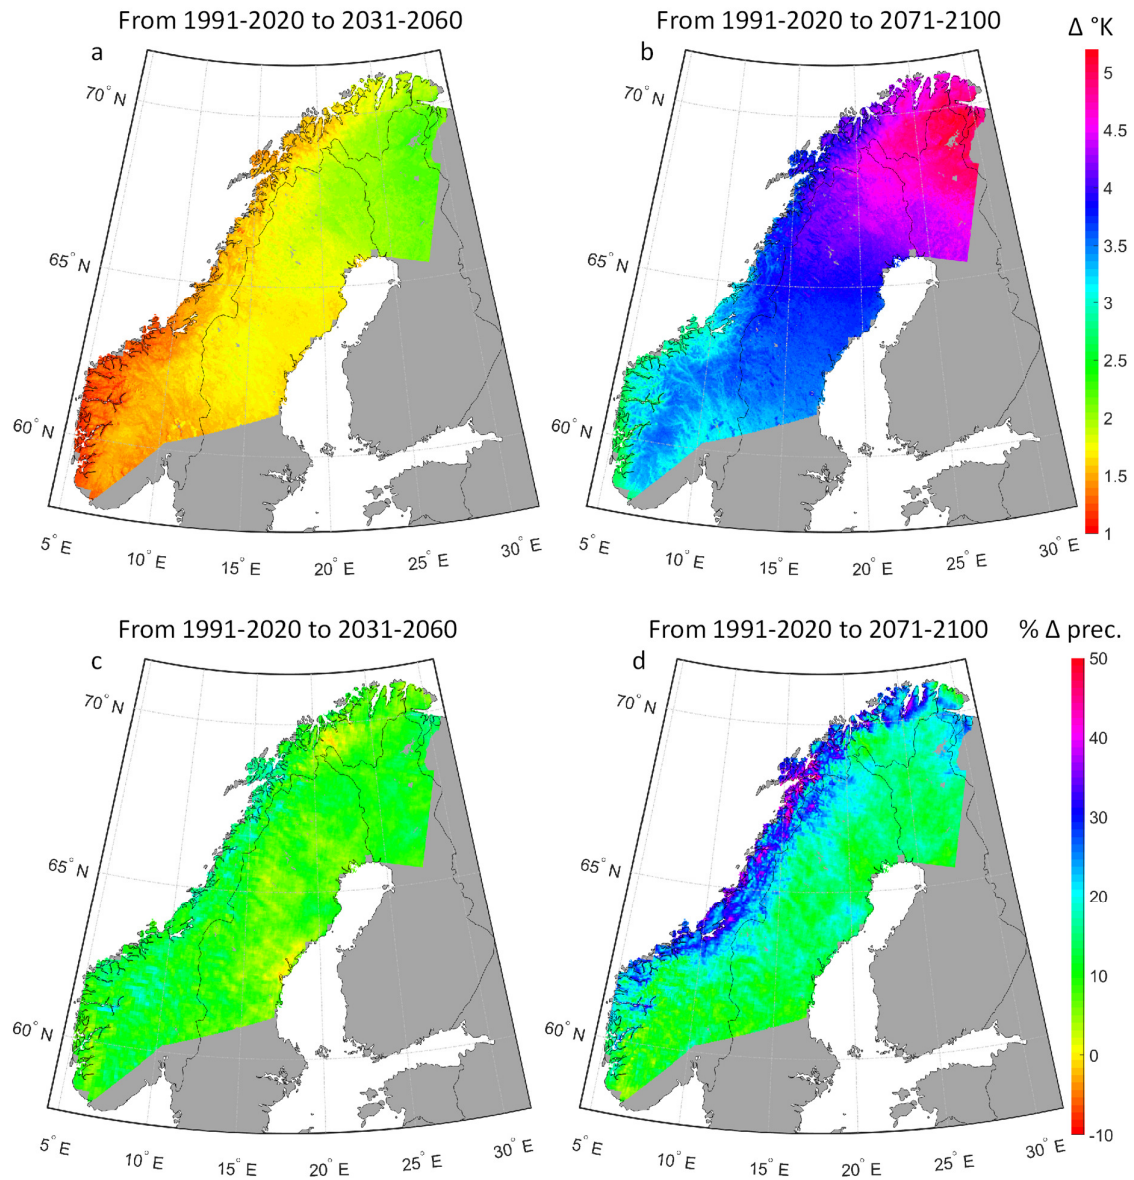

**Figure S4.** Change in mean annual air temperature (a, b) and relative change in annual precipitation (c, d) from the 1991-2020 to the 2031-2060 30-year periods (a, c) and from 1991-2020 to 2071-2100 (b, d) for the constructed complete 1985-2100 RCP8.5 dataset used in the vegetation model simulations.

## S5. Description of conversion of PFT LAI to vegetation classes

First gridcells classified as water according to the 2018 Corine vegetation map were set to water for both GLCE and Corine, and gridcells with a wetland fraction (prescribed and constant over the simulation period based on the PEATMAP product (Xu et al., 2018)) above 0.5 were set to “Peat bogs” and “Bogs and marches” for GLCE and Corine respectively. The rest of the classification was based on simulated LAI of the different PFTs, using these sums and fractions:

totalLAI: sum of all PFTs’ LAI

forestLAI: sum of all tree PFTs’ LAI (BNE, BINE, IBS, TeBS)

conLAIfrac: sum of conifer tree PFTs’ LAI divided by forestLAI

woodLAIfrac: forestLAI + tall shrub PFTs’ LAI divided by totalLAI

needleLAIwoodfrac: sum of conifer tree and shrub PFTs’ LAI divided by (forestLAI + tall shrub LAI)

shrubLAIfrac: sum of tall and short shrubs LAI divided by totalLAI

grassLAIfrac: sum of grass and forb PFTs’ LAI divided by total LAI excluding forestLAI and tall shrub LAI

sedgaLAIfrac: sum of short shrubs, graminoid and forb tundra and flood tolerant grass PFTs LAI divided by totalLAI

CLMgrassLAIfrac: graminoid and forb tundra, cushion forb, lichen and moss tundra and flood tolerant grass PFTs LAI divided by totalLAI

These were then applied according to the FigS5a-b schemes below which are based on the definitions in Bartalev et al. (2003) and Kosztra et al. (2019) for GLCE and Corine, respectively.

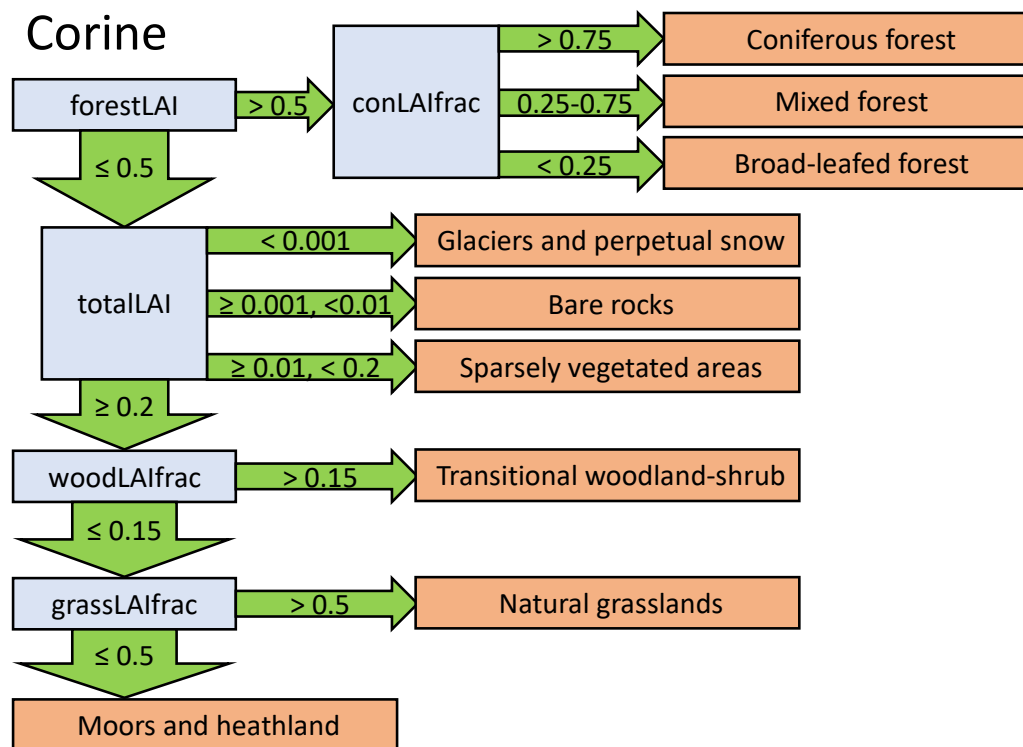

**Figure S5a.** Scheme for the vegetation classification according to Corine based on simulated LAI.

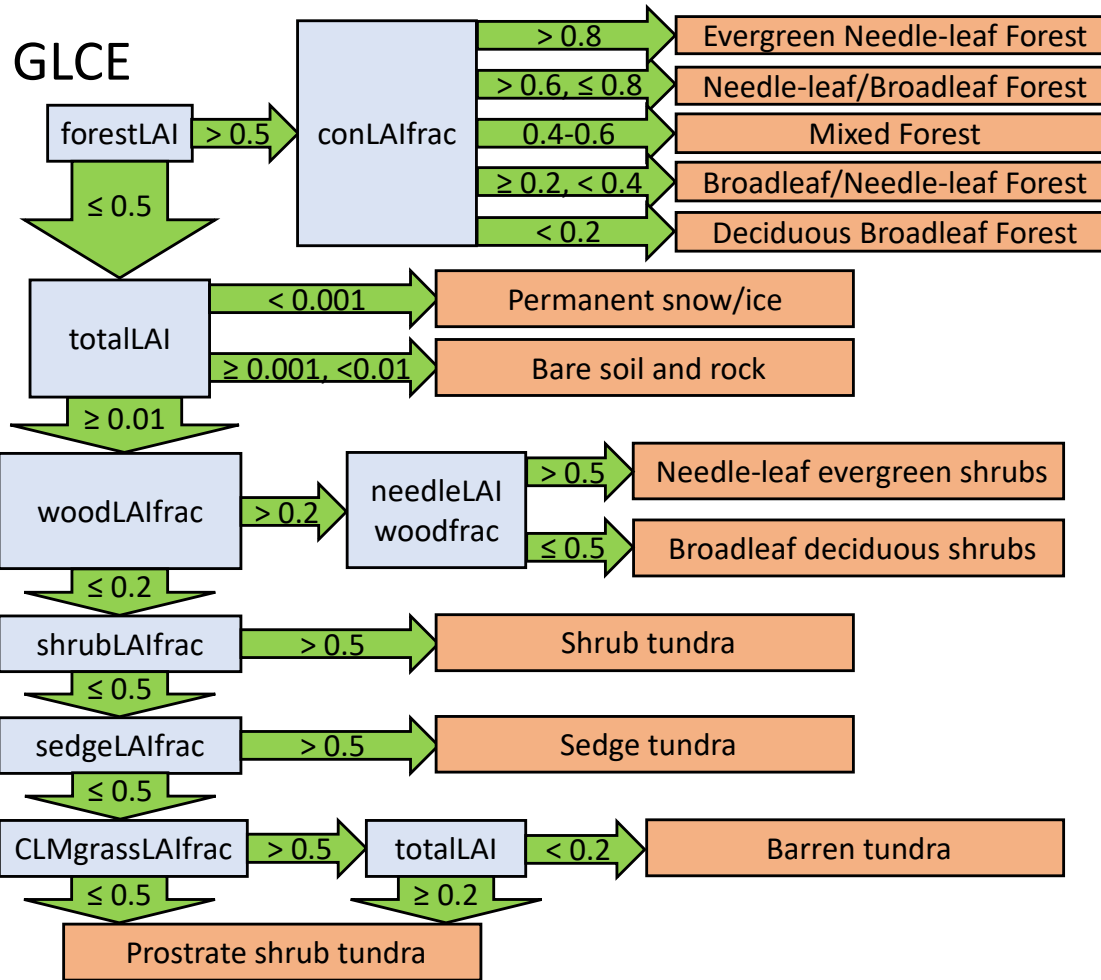

**Figure S5b.** Scheme for the vegetation classification according to GLCE based on simulated LAI.

## References

- Bartalev, S. A., Belward, A. S., Erchov, D. V., and Isaev, A. S.: A new SPOT4-VEGETATION derived land cover map of Northern Eurasia, *International Journal of Remote Sensing*, 24, 1977-1982, <https://doi.org/10.1080/0143116031000066297>, 2003.
- Kosztra, B., Büttner, G., Hazeu, G., and Arnold, S.: Updated CLC illustrated nomenclature guidelines, European Topic Centre on Urban, land and soil systems, 126, 2019.
- Xu, J., Morris, P. J., Liu, J., and Holden, J.: PEATMAP: Refining estimates of global peatland distribution based on a meta-analysis, *Catena*, 160, 134-140, <https://doi.org/10.1016/j.catena.2017.09.010>, 2018.

## S6. Validation results

**Table S6a.** Confusion matrix for vegetation classification in 3×3 km gridcells, calculated using simulation output for 1995-2004 compared to the satellite-based GLCE product for 2000. Classes that were not simulated (e.g. cropland and urban) or prescribed (wetlands and water) were not included. The overall accuracy was 32.4%. Merging data to broader classes gave: Forest user accuracy 83.7%, Forest producer accuracy 89.6%, Shrub user accuracy 0.7%, Shrub producer accuracy 17.1%, Tundra user accuracy 82.7%, Tundra producer accuracy 35.8%.

| Sat. class.        | LPJ-Guess classification     |                            |                              |              |                              |                            |                              |                        |              |              |                    |                    |       | User accuracy |
|--------------------|------------------------------|----------------------------|------------------------------|--------------|------------------------------|----------------------------|------------------------------|------------------------|--------------|--------------|--------------------|--------------------|-------|---------------|
|                    | Evergreen Needle-leaf Forest | Deciduous Broadleaf Forest | Needle-leaf/Broadleaf Forest | Mixed Forest | Broadleaf/Needle-leaf Forest | Broadleaf deciduous shrubs | Needle-leaf evergreen shrubs | Prostrate shrub tundra | Sedge tundra | Shrub tundra | Bare soil and rock | Permanent snow/ice | Total |               |
| E. NL For.         | 16129                        | 1320                       | 5454                         | 4357         | 2270                         | 187                        | 483                          | 110                    | 213          | 0            | 0                  | 0                  | 30523 | 72.9%         |
| D. BL For.         | 2433                         | 99                         | 351                          | 193          | 120                          | 24                         | 84                           | 21                     | 72           | 0            | 2                  | 0                  | 3399  | 2.1%          |
| NL/BL For.         | 607                          | 14                         | 254                          | 158          | 65                           | 0                          | 4                            | 1                      | 5            | 0            | 0                  | 0                  | 1108  | 3.9%          |
| M. For.            | 314                          | 19                         | 112                          | 66           | 26                           | 0                          | 4                            | 0                      | 5            | 0            | 0                  | 0                  | 546   | 1.3%          |
| BL/NL For.         | 98                           | 3                          | 77                           | 56           | 15                           | 1                          | 4                            | 0                      | 1            | 0            | 0                  | 0                  | 255   | 0.5%          |
| BL D. shr.         | 165                          | 16                         | 8                            | 2            | 5                            | 28                         | 26                           | 9                      | 45           | 0            | 0                  | 0                  | 304   | 0.5%          |
| NL e. shr.         | 7                            | 2                          | 0                            | 1            | 1                            | 0                          | 1                            | 0                      | 6            | 0            | 0                  | 0                  | 18    | 0.0%          |
| Prost. shr. tundra | 65                           | 62                         | 4                            | 3            | 0                            | 953                        | 110                          | 411                    | 1922         | 8            | 803                | 67                 | 4408  | 23.2%         |
| Sedge tundra       | 362                          | 597                        | 11                           | 10           | 10                           | 1251                       | 316                          | 301                    | 1445         | 3            | 56                 | 2                  | 4364  | 19.1%         |
| Shrub tundra       | 1830                         | 2618                       | 181                          | 156          | 262                          | 2757                       | 1077                         | 796                    | 2844         | 28           | 306                | 27                 | 12882 | 65.1%         |
| Bare soil and rock | 125                          | 10                         | 2                            | 1            | 4                            | 212                        | 66                           | 124                    | 977          | 4            | 1347               | 425                | 3297  | 50.8%         |
| Perm. snow/ice     | 0                            | 0                          | 0                            | 0            | 0                            | 1                          | 0                            | 2                      | 27           | 0            | 136                | 66                 | 232   | 11.2%         |
| Total              | 22135                        | 4760                       | 6454                         | 5003         | 2778                         | 5414                       | 2175                         | 1775                   | 7562         | 43           | 2650               | 587                | 61336 |               |
| Prod. Acc.         | 52.8%                        | 2.9%                       | 22.9%                        | 12.1%        | 5.9%                         | 9.2%                       | 5.6%                         | 9.3%                   | 33.1%        | 0.2%         | 40.9%              | 28.4%              |       |               |

**Table S6b.** Confusion matrix for vegetation classification in 3x3 km gridcells, calculated using simulation output for 2013-2022 compared to the satellite-based Corine product for 2018. Classes that were not simulated (e.g. cropland and urban) or prescribed (wetlands and water) were not included. The overall accuracy was 37.1%. Treating forest as one big class gave a user accuracy of 84.4% and producer accuracy 93.7%.

| LPJ-Guess classification | Broad-leaved forest | Coniferous forest | Mixed forest | Natural grasslands | Moors and heathland | Transitional woodland-shrub | Bare rocks | Sparsely vegetated areas | Glaciers and perpetual snow | Total | User accuracy |
|--------------------------|---------------------|-------------------|--------------|--------------------|---------------------|-----------------------------|------------|--------------------------|-----------------------------|-------|---------------|
| Satellite class.         |                     |                   |              |                    |                     |                             |            |                          |                             |       |               |
| BL forest                | 2150                | 2195              | 647          | 331                | 50                  | 1787                        | 2          | 32                       | 0                           | 7194  | 38.9%         |
| Con. forest              | 1542                | 17434             | 10848        | 10                 | 2                   | 212                         | 0          | 1                        | 0                           | 30049 | 69.0%         |
| Mixed forest             | 301                 | 1086              | 535          | 3                  | 0                   | 30                          | 0          | 0                        | 0                           | 1955  | 4.2%          |
| Natural grassl.          | 0                   | 0                 | 0            | 36                 | 3                   | 4                           | 4          | 43                       | 1                           | 91    | 0.7%          |
| Moors and heathl.        | 971                 | 1941              | 187          | 1622               | 377                 | 2834                        | 15         | 649                      | 5                           | 8601  | 17.6%         |
| Trans. woodl.-shrub      | 59                  | 779               | 337          | 1                  | 0                   | 2                           | 0          | 0                        | 0                           | 1178  | 0.0%          |
| Bare rocks               | 37                  | 90                | 14           | 704                | 54                  | 267                         | 618        | 700                      | 270                         | 2754  | 56.1%         |
| Sparsely veg. areas      | 465                 | 1731              | 182          | 2447               | 420                 | 2662                        | 321        | 1966                     | 165                         | 10359 | 57.4%         |
| Glac. & perp. snow       | 0                   | 1                 | 0            | 22                 | 0                   | 9                           | 141        | 37                       | 80                          | 290   | 15.4%         |
| Total                    | 5525                | 25257             | 12750        | 5176               | 906                 | 7807                        | 1101       | 3428                     | 521                         | 62471 |               |
| Producer accuracy        | 29.9%               | 58.0%             | 27.4%        | 39.6%              | 4.4%                | 0.2%                        | 22.4%      | 19.0%                    | 27.6%                       |       |               |

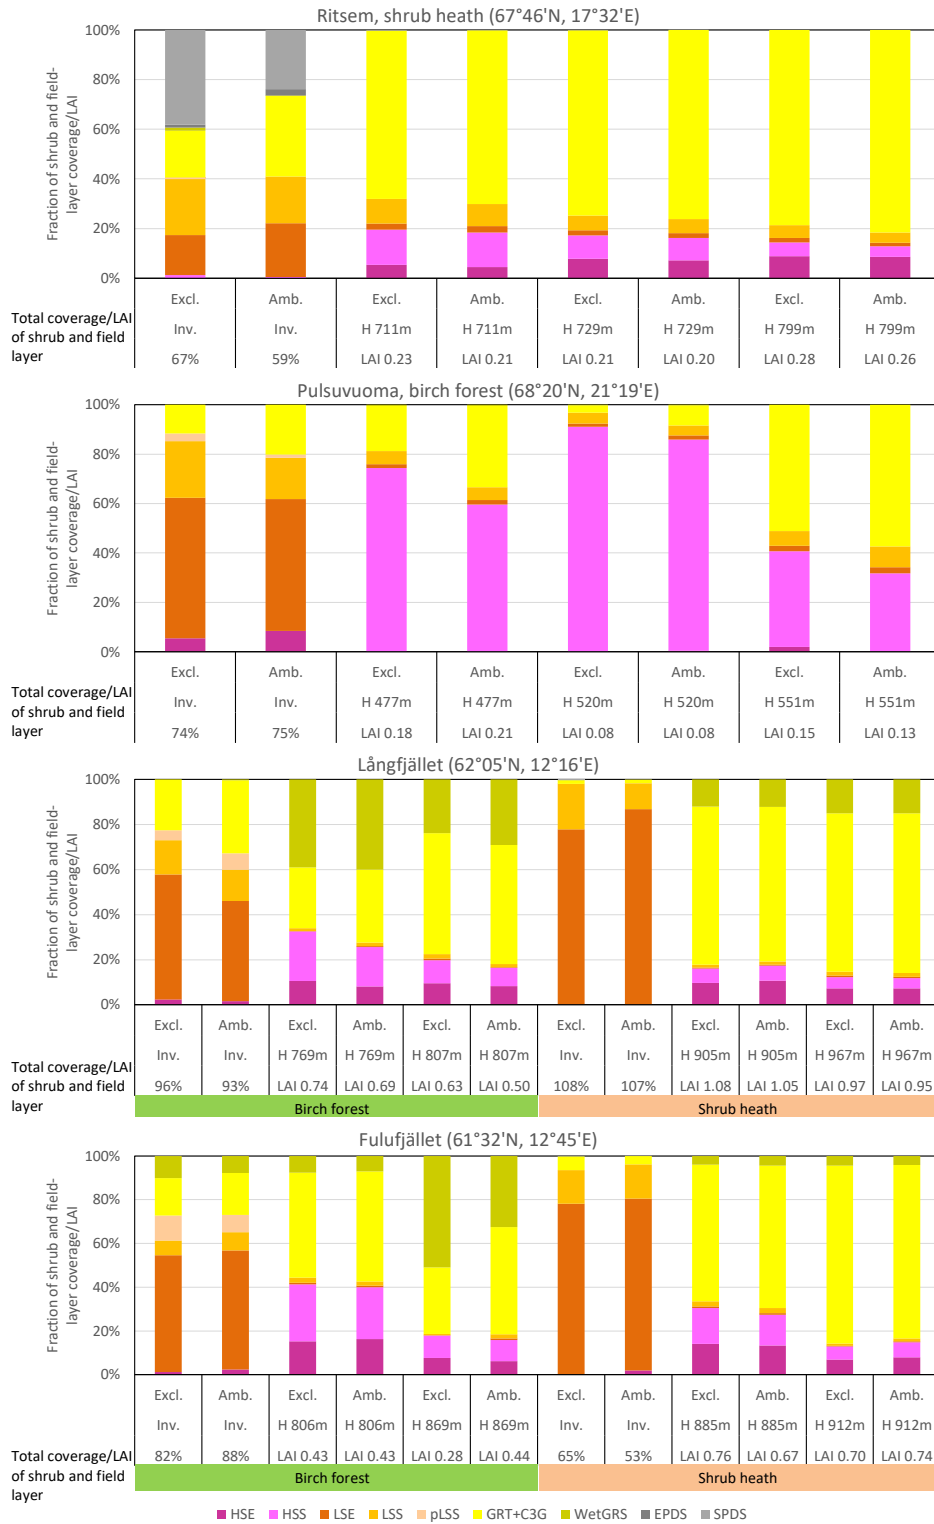

**Figure S6.** Composition of inventoried (coverage in 2011) and simulated (LAI mean 2009-2013) shrub and field layer vegetation (see Table 1 for explanation of vegetation types) for four locations with exclosure experiments in both/either birch forest and/or shrub heath (Vowles et al., 2017a), shown for plots or simulations with reindeer excluded from 1995 or ambient with reindeer access. Simulations were done for 2-3 gridcells with a representative range in altitude (H).

## S7. Confusion matrixes for simulated and satellite-based vegetation classes

**Table S7a.** Confusion matrix for vegetation classification in 3×3 km gridcells for a 90×90 km area around Abisko, simulations for 1995-2004 compared to the satellite-based GLCE product for 2000 and simulations 2091-2100. Classes that were not simulated (e.g. cropland and urban) or prescribed (wetlands and water) were not included. The total number of comparisons are higher for LPJ-GUESS 1995-2004 against 2091-2100 than for comparison with the satellite-based class, as cells with a satellite-based class that was not simulated (e.g. urban) were filtered out in that comparison.

|                                |                  | LPJ-Guess simulation 1995-2004 |            |            |         |            |            |            |                  |            |            |                  |                |       |
|--------------------------------|------------------|--------------------------------|------------|------------|---------|------------|------------|------------|------------------|------------|------------|------------------|----------------|-------|
|                                |                  | E. NL For.                     | D. BL For. | NL/BL For. | M. For. | BL/NL For. | BL D. shr. | NL e. shr. | Prost. shr. tun. | Sedge tun. | Shrub tun. | Bare soil & rock | Perm. snow/ice | Total |
| Satellite-based class 2000     | E. NL For.       | 0                              | 7          | 0          | 0       | 5          | 1          | 0          | 0                | 0          | 0          | 0                | 0              | 13    |
|                                | D. BL For.       | 0                              | 0          | 0          | 0       | 0          | 0          | 0          | 0                | 0          | 0          | 0                | 0              | 0     |
|                                | NL/BL For.       | 0                              | 0          | 0          | 0       | 0          | 0          | 0          | 0                | 0          | 0          | 0                | 0              | 0     |
|                                | M. For.          | 0                              | 0          | 0          | 0       | 0          | 0          | 0          | 0                | 0          | 0          | 0                | 0              | 0     |
|                                | BL/NL For.       | 0                              | 0          | 0          | 0       | 0          | 0          | 0          | 0                | 0          | 0          | 0                | 0              | 0     |
|                                | BL D. shr.       | 0                              | 3          | 0          | 0       | 0          | 1          | 0          | 0                | 0          | 0          | 0                | 0              | 4     |
|                                | NL e. shr.       | 0                              | 0          | 0          | 0       | 0          | 0          | 0          | 0                | 0          | 0          | 0                | 0              | 0     |
|                                | Prost. shr. tun. | 0                              | 0          | 0          | 0       | 0          | 19         | 1          | 34               | 76         | 0          | 102              | 5              | 237   |
|                                | Sedge tun.       | 0                              | 1          | 1          | 0       | 0          | 43         | 0          | 30               | 28         | 0          | 1                | 0              | 104   |
|                                | Shrub tun.       | 0                              | 36         | 0          | 0       | 2          | 123        | 7          | 23               | 38         | 0          | 10               | 0              | 239   |
|                                | Bare soil & rock | 0                              | 0          | 0          | 0       | 1          | 3          | 0          | 4                | 37         | 0          | 140              | 23             | 208   |
| Perm. snow/ice                 | 0                | 0                              | 0          | 0          | 0       | 0          | 0          | 0          | 1                | 0          | 0          | 0                | 1              |       |
| Total                          | 0                | 47                             | 1          | 0          | 8       | 190        | 8          | 91         | 180              | 0          | 253        | 28               | 806            |       |
| LPJ-Guess simulation 2091-2100 | E. NL For.       | 0                              | 0          | 3          | 0       | 0          | 86         | 1          | 5                | 2          | 0          | 0                | 0              | 97    |
|                                | D. BL For.       | 0                              | 0          | 0          | 0       | 0          | 0          | 0          | 2                | 7          | 0          | 66               | 22             | 97    |
|                                | NL/BL For.       | 1                              | 7          | 0          | 1       | 3          | 22         | 2          | 1                | 0          | 0          | 0                | 0              | 37    |
|                                | M. For.          | 0                              | 33         | 0          | 0       | 7          | 10         | 0          | 0                | 0          | 0          | 0                | 0              | 50    |
|                                | BL/NL For.       | 0                              | 17         | 0          | 0       | 1          | 2          | 0          | 0                | 4          | 0          | 10               | 0              | 34    |
|                                | BL D. shr.       | 0                              | 0          | 0          | 0       | 0          | 0          | 0          | 0                | 6          | 0          | 37               | 3              | 46    |
|                                | NL e. shr.       | 0                              | 0          | 0          | 0       | 0          | 87         | 5          | 85               | 89         | 0          | 120              | 0              | 386   |
|                                | Prost. shr. tun. | 0                              | 0          | 0          | 0       | 0          | 0          | 0          | 0                | 0          | 0          | 12               | 2              | 14    |
|                                | Sedge tun.       | 0                              | 0          | 0          | 0       | 0          | 0          | 0          | 1                | 76         | 0          | 9                | 1              | 87    |
|                                | Shrub tun.       | 0                              | 0          | 0          | 0       | 0          | 0          | 0          | 0                | 0          | 0          | 0                | 0              | 0     |
|                                | Bare soil & rock | 0                              | 0          | 0          | 0       | 0          | 0          | 0          | 0                | 0          | 0          | 1                | 0              | 1     |
| Perm. snow/ice                 | 0                | 0                              | 0          | 0          | 0       | 0          | 0          | 0          | 0                | 0          | 0          | 0                | 0              |       |
| Total                          | 1                | 57                             | 3          | 1          | 11      | 207        | 8          | 94         | 184              | 0          | 255        | 28               | 849            |       |

**Table S7b.** Confusion matrix for vegetation classification in 3×3 km gridcells for a 90×90 km area around Vindeln, simulations for 1995-2004 compared to the satellite-based GLCE product for 2000 and simulations 2091-2100. Classes that were not simulated (e.g. cropland and urban) or prescribed (wetlands and water) were not included. The total number of comparisons are higher for LPJ-GUESS 1995-2004 against 2091-2100 than for comparison with the satellite-based class, as cells with a satellite-based class that was not simulated (e.g. urban) were filtered out in that comparison.

|                                |                  | LPJ-Guess simulation 1995-2004 |            |            |         |            |            |            |                  |            |            |                  |                |       |
|--------------------------------|------------------|--------------------------------|------------|------------|---------|------------|------------|------------|------------------|------------|------------|------------------|----------------|-------|
|                                |                  | E. NL For.                     | D. BL For. | NL/BL For. | M. For. | BL/NL For. | BL D. shr. | NL e. shr. | Prost. shr. tun. | Sedge tun. | Shrub tun. | Bare soil & rock | Perm. snow/ice | Total |
| Satellite-based class 2000     | E. NL For.       | 234                            | 3          | 61         | 20      | 4          | 13         | 73         | 7                | 36         | 0          | 0                | 0              | 451   |
|                                | D. BL For.       | 4                              | 1          | 0          | 1       | 1          | 5          | 12         | 3                | 19         | 0          | 0                | 0              | 46    |
|                                | NL/BL For.       | 2                              | 0          | 0          | 1       | 0          | 0          | 1          | 0                | 0          | 0          | 0                | 0              | 4     |
|                                | M. For.          | 3                              | 0          | 0          | 0       | 0          | 0          | 1          | 0                | 1          | 0          | 0                | 0              | 5     |
|                                | BL/NL For.       | 1                              | 0          | 0          | 0       | 0          | 0          | 2          | 0                | 1          | 0          | 0                | 0              | 4     |
|                                | BL D. shr.       | 0                              | 0          | 0          | 0       | 0          | 4          | 3          | 0                | 15         | 0          | 0                | 0              | 22    |
|                                | NL e. shr.       | 0                              | 0          | 0          | 0       | 0          | 0          | 0          | 0                | 1          | 0          | 0                | 0              | 1     |
|                                | Prost. shr. tun. | 0                              | 0          | 0          | 0       | 0          | 4          | 0          | 0                | 13         | 0          | 5                | 0              | 22    |
|                                | Sedge tun.       | 0                              | 0          | 0          | 0       | 0          | 27         | 1          | 3                | 84         | 0          | 0                | 0              | 115   |
|                                | Shrub tun.       | 0                              | 0          | 0          | 0       | 0          | 34         | 9          | 7                | 79         | 0          | 1                | 0              | 130   |
|                                | Bare soil & rock | 0                              | 0          | 0          | 0       | 0          | 0          | 0          | 0                | 2          | 0          | 3                | 0              | 5     |
|                                | Perm. snow/ice   | 0                              | 0          | 0          | 0       | 0          | 0          | 0          | 0                | 0          | 0          | 0                | 0              | 0     |
|                                | Total            | 244                            | 4          | 61         | 22      | 5          | 87         | 102        | 20               | 251        | 0          | 9                | 0              | 805   |
| LPJ-Guess simulation 2091-2100 | E. NL For.       | 262                            | 0          | 62         | 20      | 3          | 47         | 109        | 19               | 181        | 0          | 0                | 0              | 703   |
|                                | D. BL For.       | 0                              | 0          | 0          | 0       | 0          | 0          | 0          | 0                | 1          | 0          | 1                | 0              | 2     |
|                                | NL/BL For.       | 6                              | 3          | 0          | 2       | 3          | 12         | 1          | 0                | 1          | 0          | 0                | 0              | 28    |
|                                | M. For.          | 0                              | 2          | 0          | 0       | 0          | 0          | 0          | 0                | 0          | 0          | 0                | 0              | 2     |
|                                | BL/NL For.       | 0                              | 0          | 0          | 0       | 0          | 0          | 0          | 0                | 0          | 0          | 0                | 0              | 0     |
|                                | BL D. shr.       | 0                              | 0          | 0          | 0       | 0          | 0          | 0          | 0                | 0          | 0          | 0                | 0              | 0     |
|                                | NL e. shr.       | 0                              | 0          | 0          | 0       | 0          | 36         | 1          | 3                | 83         | 0          | 8                | 0              | 131   |
|                                | Prost. shr. tun. | 0                              | 0          | 0          | 0       | 0          | 0          | 0          | 0                | 0          | 0          | 0                | 0              | 0     |
|                                | Sedge tun.       | 0                              | 0          | 0          | 0       | 0          | 0          | 0          | 0                | 13         | 0          | 0                | 0              | 13    |
|                                | Shrub tun.       | 0                              | 0          | 0          | 0       | 0          | 0          | 0          | 0                | 0          | 0          | 0                | 0              | 0     |
|                                | Bare soil & rock | 0                              | 0          | 0          | 0       | 0          | 0          | 0          | 0                | 0          | 0          | 0                | 0              | 0     |
|                                | Perm. snow/ice   | 0                              | 0          | 0          | 0       | 0          | 0          | 0          | 0                | 0          | 0          | 0                | 0              | 0     |
|                                | Total            | 268                            | 5          | 62         | 22      | 6          | 95         | 111        | 22               | 279        | 0          | 9                | 0              | 879   |



**Table S7c.** Confusion matrix for vegetation classification in 3×3 km gridcells for a 90×90 km area around Helags, simulations for 1995-2004 compared to the satellite-based GLCE product for 2000 and simulations 2091-2100. Classes that were not simulated (e.g. cropland and urban) or prescribed (wetlands and water) were not included. The total number of comparisons are higher for LPJ-GUESS 1995-2004 against 2091-2100 than for comparison with the satellite-based class, as cells with a satellite-based class that was not simulated (e.g. urban) were filtered out in that comparison.

|                                |                  | LPJ-Guess simulation 1995-2004 |            |            |         |            |            |            |                  |            |            |                  |                |       |
|--------------------------------|------------------|--------------------------------|------------|------------|---------|------------|------------|------------|------------------|------------|------------|------------------|----------------|-------|
|                                |                  | E. NL For.                     | D. BL For. | NL/BL For. | M. For. | BL/NL For. | BL D. shr. | NL e. shr. | Prost. shr. tun. | Sedge tun. | Shrub tun. | Bare soil & rock | Perm. snow/ice | Total |
| Satellite-based class 2000     | E. NL For.       | 349                            | 0          | 22         | 3       | 0          | 0          | 9          | 0                | 9          | 0          | 0                | 0              | 392   |
|                                | D. BL For.       | 43                             | 0          | 0          | 0       | 0          | 0          | 0          | 0                | 0          | 0          | 0                | 0              | 43    |
|                                | NL/BL For.       | 16                             | 0          | 0          | 0       | 0          | 0          | 0          | 0                | 0          | 0          | 0                | 0              | 16    |
|                                | M. For.          | 11                             | 0          | 0          | 0       | 0          | 0          | 0          | 0                | 0          | 0          | 0                | 0              | 11    |
|                                | BL/NL For.       | 0                              | 0          | 0          | 0       | 0          | 0          | 0          | 0                | 0          | 0          | 0                | 0              | 0     |
|                                | BL D. shr.       | 7                              | 0          | 0          | 0       | 0          | 0          | 1          | 0                | 0          | 0          | 0                | 0              | 8     |
|                                | NL e. shr.       | 0                              | 0          | 0          | 0       | 0          | 0          | 0          | 0                | 0          | 0          | 0                | 0              | 0     |
|                                | Prost. shr. tun. | 0                              | 0          | 0          | 0       | 0          | 5          | 0          | 1                | 12         | 0          | 1                | 0              | 19    |
|                                | Sedge tun.       | 1                              | 0          | 0          | 1       | 0          | 18         | 29         | 2                | 82         | 0          | 0                | 0              | 133   |
|                                | Shrub tun.       | 45                             | 0          | 2          | 1       | 0          | 20         | 52         | 4                | 97         | 0          | 2                | 0              | 223   |
|                                | Bare soil & rock | 0                              | 0          | 0          | 0       | 0          | 0          | 0          | 0                | 0          | 0          | 1                | 0              | 1     |
|                                | Perm. snow/ice   | 0                              | 0          | 0          | 0       | 0          | 0          | 0          | 0                | 0          | 0          | 0                | 0              | 0     |
|                                | Total            | 472                            | 0          | 24         | 5       | 0          | 43         | 91         | 7                | 200        | 0          | 4                | 0              | 846   |
| LPJ-Guess simulation 2091-2100 | E. NL For.       | 468                            | 0          | 27         | 6       | 0          | 27         | 93         | 5                | 157        | 0          | 0                | 0              | 783   |
|                                | D. BL For.       | 0                              | 0          | 0          | 0       | 0          | 0          | 0          | 0                | 0          | 0          | 0                | 0              | 0     |
|                                | NL/BL For.       | 26                             | 0          | 0          | 0       | 0          | 0          | 0          | 0                | 0          | 0          | 0                | 0              | 26    |
|                                | M. For.          | 15                             | 0          | 0          | 0       | 0          | 0          | 0          | 0                | 0          | 0          | 0                | 0              | 15    |
|                                | BL/NL For.       | 2                              | 0          | 0          | 0       | 0          | 0          | 0          | 0                | 0          | 0          | 0                | 0              | 2     |
|                                | BL D. shr.       | 0                              | 0          | 0          | 0       | 0          | 0          | 0          | 0                | 0          | 0          | 0                | 0              | 0     |
|                                | NL e. shr.       | 0                              | 0          | 0          | 0       | 0          | 16         | 0          | 2                | 46         | 0          | 4                | 0              | 68    |
|                                | Prost. shr. tun. | 0                              | 0          | 0          | 0       | 0          | 0          | 0          | 0                | 0          | 0          | 0                | 0              | 0     |
|                                | Sedge tun.       | 0                              | 0          | 0          | 0       | 0          | 0          | 0          | 0                | 3          | 0          | 0                | 0              | 3     |
|                                | Shrub tun.       | 0                              | 0          | 0          | 0       | 0          | 0          | 0          | 0                | 0          | 0          | 0                | 0              | 0     |
|                                | Bare soil & rock | 0                              | 0          | 0          | 0       | 0          | 0          | 0          | 0                | 0          | 0          | 0                | 0              | 0     |
|                                | Perm. snow/ice   | 0                              | 0          | 0          | 0       | 0          | 0          | 0          | 0                | 0          | 0          | 0                | 0              | 0     |
|                                | Total            | 511                            | 0          | 27         | 6       | 0          | 43         | 93         | 7                | 206        | 0          | 4                | 0              | 897   |

**Table S7d.** Confusion matrix for vegetation classification in 3×3 km gridcells for a 90×90 km area around Fulu, simulations for 1995-2004 compared to the satellite-based GLCE product for 2000 and simulations 2091-2100. Classes that were not simulated (e.g. cropland and urban) or prescribed (wetlands and water) were not included. The total number of comparisons are higher for LPJ-GUESS 1995-2004 against 2091-2100 than for comparison with the satellite-based class, as cells with a satellite-based class that was not simulated (e.g. urban) were filtered out in that comparison.

|                                |                  | LPJ-Guess simulation 1995-2004 |            |            |         |            |            |            |                  |            |            |                  |                |       |
|--------------------------------|------------------|--------------------------------|------------|------------|---------|------------|------------|------------|------------------|------------|------------|------------------|----------------|-------|
|                                |                  | E. NL For.                     | D. BL For. | NL/BL For. | M. For. | BL/NL For. | BL D. shr. | NL e. shr. | Prost. shr. tun. | Sedge tun. | Shrub tun. | Bare soil & rock | Perm. snow/ice | Total |
| Satellite-based class 2000     | E. NL For.       | 679                            | 0          | 41         | 2       | 0          | 0          | 0          | 0                | 0          | 0          | 0                | 0              | 722   |
|                                | D. BL For.       | 7                              | 0          | 0          | 0       | 0          | 0          | 0          | 0                | 0          | 0          | 0                | 0              | 7     |
|                                | NL/BL For.       | 6                              | 0          | 0          | 0       | 0          | 0          | 0          | 0                | 0          | 0          | 0                | 0              | 6     |
|                                | M. For.          | 1                              | 0          | 1          | 0       | 0          | 0          | 0          | 0                | 0          | 0          | 0                | 0              | 2     |
|                                | BL/NL For.       | 0                              | 0          | 0          | 0       | 0          | 0          | 0          | 0                | 0          | 0          | 0                | 0              | 0     |
|                                | BL D. shr.       | 1                              | 0          | 0          | 0       | 0          | 0          | 0          | 0                | 0          | 0          | 0                | 0              | 1     |
|                                | NL e. shr.       | 0                              | 0          | 0          | 0       | 0          | 0          | 0          | 0                | 0          | 0          | 0                | 0              | 0     |
|                                | Prost. shr. tun. | 0                              | 0          | 0          | 0       | 0          | 0          | 0          | 0                | 0          | 0          | 0                | 0              | 0     |
|                                | Sedge tun.       | 9                              | 0          | 0          | 0       | 0          | 0          | 3          | 0                | 1          | 0          | 0                | 0              | 13    |
|                                | Shrub tun.       | 60                             | 0          | 3          | 0       | 0          | 0          | 7          | 0                | 3          | 0          | 0                | 0              | 73    |
|                                | Bare soil & rock | 0                              | 0          | 0          | 0       | 0          | 0          | 0          | 0                | 0          | 0          | 0                | 0              | 0     |
|                                | Perm. snow/ice   | 0                              | 0          | 0          | 0       | 0          | 0          | 0          | 0                | 0          | 0          | 0                | 0              | 0     |
|                                | Total            | 763                            | 0          | 45         | 2       | 0          | 0          | 10         | 0                | 4          | 0          | 0                | 0              | 824   |
| LPJ-Guess simulation 2091-2100 | E. NL For.       | 545                            | 0          | 24         | 0       | 0          | 0          | 10         | 0                | 4          | 0          | 0                | 0              | 583   |
|                                | D. BL For.       | 0                              | 0          | 0          | 0       | 0          | 0          | 0          | 0                | 0          | 0          | 0                | 0              | 0     |
|                                | NL/BL For.       | 217                            | 0          | 12         | 1       | 0          | 0          | 0          | 0                | 0          | 0          | 0                | 0              | 230   |
|                                | M. For.          | 52                             | 0          | 11         | 0       | 0          | 0          | 0          | 0                | 0          | 0          | 0                | 0              | 63    |
|                                | BL/NL For.       | 1                              | 0          | 0          | 1       | 0          | 0          | 0          | 0                | 0          | 0          | 0                | 0              | 2     |
|                                | BL D. shr.       | 0                              | 0          | 0          | 0       | 0          | 0          | 0          | 0                | 0          | 0          | 0                | 0              | 0     |
|                                | NL e. shr.       | 0                              | 0          | 0          | 0       | 0          | 0          | 0          | 0                | 0          | 0          | 0                | 0              | 0     |
|                                | Prost. shr. tun. | 0                              | 0          | 0          | 0       | 0          | 0          | 0          | 0                | 0          | 0          | 0                | 0              | 0     |
|                                | Sedge tun.       | 0                              | 0          | 0          | 0       | 0          | 0          | 0          | 0                | 0          | 0          | 0                | 0              | 0     |
|                                | Shrub tun.       | 0                              | 0          | 0          | 0       | 0          | 0          | 0          | 0                | 0          | 0          | 0                | 0              | 0     |
|                                | Bare soil & rock | 0                              | 0          | 0          | 0       | 0          | 0          | 0          | 0                | 0          | 0          | 0                | 0              | 0     |
|                                | Perm. snow/ice   | 0                              | 0          | 0          | 0       | 0          | 0          | 0          | 0                | 0          | 0          | 0                | 0              | 0     |
|                                | Total            | 815                            | 0          | 47         | 2       | 0          | 0          | 10         | 0                | 4          | 0          | 0                | 0              | 878   |

**Table S7e.** Confusion matrix for vegetation classification in 3×3 km gridcells for a 90×90 km area around Muddus, simulations for 1995-2004 compared to the satellite-based GLCE product for 2000 and simulations 2091-2100. Classes that were not simulated (e.g. cropland and urban) or prescribed (wetlands and water) were not included. The total number of comparisons are higher for LPJ-GUESS 1995-2004 against 2091-2100 than for comparison with the satellite-based class, as cells with a satellite-based class that was not simulated (e.g. urban) were filtered out in that comparison.

|                                |                  | LPJ-Guess simulation 1995-2004 |            |            |         |            |            |            |                  |            |            |                  |                |       |
|--------------------------------|------------------|--------------------------------|------------|------------|---------|------------|------------|------------|------------------|------------|------------|------------------|----------------|-------|
|                                |                  | E. NL For.                     | D. BL For. | NL/BL For. | M. For. | BL/NL For. | BL D. shr. | NL e. shr. | Prost. shr. tun. | Sedge tun. | Shrub tun. | Bare soil & rock | Perm. snow/ice | Total |
| Satellite-based class 2000     | E. NL For.       | 628                            | 4          | 39         | 17      | 8          | 3          | 5          | 0                | 0          | 0          | 0                | 0              | 704   |
|                                | D. BL For.       | 5                              | 0          | 0          | 0       | 0          | 0          | 0          | 0                | 0          | 0          | 0                | 0              | 5     |
|                                | NL/BL For.       | 4                              | 0          | 0          | 0       | 0          | 0          | 0          | 0                | 0          | 0          | 0                | 0              | 4     |
|                                | M. For.          | 1                              | 0          | 0          | 0       | 0          | 0          | 0          | 0                | 0          | 0          | 0                | 0              | 1     |
|                                | BL/NL For.       | 0                              | 0          | 0          | 0       | 0          | 0          | 0          | 0                | 0          | 0          | 0                | 0              | 0     |
|                                | BL D. shr.       | 0                              | 0          | 0          | 0       | 0          | 0          | 0          | 0                | 0          | 0          | 0                | 0              | 0     |
|                                | NL e. shr.       | 0                              | 0          | 0          | 0       | 0          | 0          | 0          | 0                | 0          | 0          | 0                | 0              | 0     |
|                                | Prost. shr. tun. | 0                              | 0          | 0          | 0       | 0          | 0          | 0          | 0                | 0          | 0          | 0                | 0              | 0     |
|                                | Sedge tun.       | 0                              | 0          | 0          | 0       | 0          | 0          | 0          | 0                | 0          | 0          | 0                | 0              | 0     |
|                                | Shrub tun.       | 3                              | 1          | 0          | 0       | 1          | 1          | 0          | 0                | 0          | 0          | 0                | 0              | 6     |
|                                | Bare soil & rock | 1                              | 0          | 0          | 0       | 0          | 0          | 0          | 0                | 0          | 0          | 0                | 0              | 1     |
|                                | Perm. snow/ice   | 0                              | 0          | 0          | 0       | 0          | 0          | 0          | 0                | 0          | 0          | 0                | 0              | 0     |
|                                | Total            | 642                            | 5          | 39         | 17      | 9          | 4          | 5          | 0                | 0          | 0          | 0                | 0              | 721   |
| LPJ-Guess simulation 2091-2100 | E. NL For.       | 568                            | 0          | 15         | 4       | 1          | 0          | 5          | 0                | 0          | 0          | 0                | 0              | 593   |
|                                | D. BL For.       | 0                              | 0          | 0          | 0       | 0          | 0          | 0          | 0                | 0          | 0          | 0                | 0              | 0     |
|                                | NL/BL For.       | 91                             | 1          | 7          | 5       | 6          | 3          | 0          | 0                | 0          | 0          | 0                | 0              | 113   |
|                                | M. For.          | 12                             | 4          | 18         | 8       | 2          | 1          | 0          | 0                | 0          | 0          | 0                | 0              | 45    |
|                                | BL/NL For.       | 0                              | 0          | 1          | 0       | 0          | 0          | 0          | 0                | 0          | 0          | 0                | 0              | 1     |
|                                | BL D. shr.       | 0                              | 0          | 0          | 0       | 0          | 0          | 0          | 0                | 0          | 0          | 0                | 0              | 0     |
|                                | NL e. shr.       | 0                              | 0          | 0          | 0       | 0          | 0          | 0          | 0                | 0          | 0          | 0                | 0              | 0     |
|                                | Prost. shr. tun. | 0                              | 0          | 0          | 0       | 0          | 0          | 0          | 0                | 0          | 0          | 0                | 0              | 0     |
|                                | Sedge tun.       | 0                              | 0          | 0          | 0       | 0          | 0          | 0          | 0                | 0          | 0          | 0                | 0              | 0     |
|                                | Shrub tun.       | 0                              | 0          | 0          | 0       | 0          | 0          | 0          | 0                | 0          | 0          | 0                | 0              | 0     |
|                                | Bare soil & rock | 0                              | 0          | 0          | 0       | 0          | 0          | 0          | 0                | 0          | 0          | 0                | 0              | 0     |
|                                | Perm. snow/ice   | 0                              | 0          | 0          | 0       | 0          | 0          | 0          | 0                | 0          | 0          | 0                | 0              | 0     |
|                                | Total            | 671                            | 5          | 41         | 17      | 9          | 4          | 5          | 0                | 0          | 0          | 0                | 0              | 752   |

**Table S7f.** Confusion matrix for vegetation classification in 3×3 km gridcells for a 90×90 km area around Björnlandet, simulations for 1995-2004 compared to the satellite-based GLCE product for 2000 and simulations 2091-2100. Classes that were not simulated (e.g. cropland and urban) or prescribed (wetlands and water) were not included. The total number of comparisons are higher for LPJ-GUESS 1995-2004 against 2091-2100 than for comparison with the satellite-based class, as cells with a satellite-based class that was not simulated (e.g. urban) were filtered out in that comparison.

|                                |                  | LPJ-Guess simulation 1995-2004 |            |            |         |            |            |            |                  |            |            |                  |                |       |
|--------------------------------|------------------|--------------------------------|------------|------------|---------|------------|------------|------------|------------------|------------|------------|------------------|----------------|-------|
|                                |                  | E. NL For.                     | D. BL For. | NL/BL For. | M. For. | BL/NL For. | BL D. shr. | NL e. shr. | Prost. shr. tun. | Sedge tun. | Shrub tun. | Bare soil & rock | Perm. snow/ice | Total |
| Satellite-based class 2000     | E. NL For.       | 189                            | 0          | 263        | 153     | 35         | 0          | 0          | 0                | 0          | 0          | 0                | 0              | 640   |
|                                | D. BL For.       | 67                             | 0          | 19         | 1       | 0          | 0          | 0          | 0                | 0          | 0          | 0                | 0              | 87    |
|                                | NL/BL For.       | 21                             | 0          | 29         | 5       | 1          | 0          | 0          | 0                | 0          | 0          | 0                | 0              | 56    |
|                                | M. For.          | 7                              | 0          | 6          | 0       | 0          | 0          | 0          | 0                | 0          | 0          | 0                | 0              | 13    |
|                                | BL/NL For.       | 15                             | 0          | 12         | 3       | 0          | 0          | 0          | 0                | 0          | 0          | 0                | 0              | 30    |
|                                | BL D. shr.       | 0                              | 0          | 0          | 0       | 0          | 0          | 0          | 0                | 0          | 0          | 0                | 0              | 0     |
|                                | NL e. shr.       | 0                              | 0          | 0          | 0       | 0          | 0          | 0          | 0                | 0          | 0          | 0                | 0              | 0     |
|                                | Prost. shr. tun. | 0                              | 0          | 0          | 0       | 0          | 0          | 0          | 0                | 0          | 0          | 0                | 0              | 0     |
|                                | Sedge tun.       | 0                              | 0          | 0          | 0       | 0          | 0          | 0          | 0                | 0          | 0          | 0                | 0              | 0     |
|                                | Shrub tun.       | 0                              | 0          | 0          | 0       | 0          | 0          | 0          | 0                | 0          | 0          | 0                | 0              | 0     |
|                                | Bare soil & rock | 0                              | 0          | 0          | 0       | 0          | 0          | 0          | 0                | 0          | 0          | 0                | 0              | 0     |
|                                | Perm. snow/ice   | 0                              | 0          | 0          | 0       | 0          | 0          | 0          | 0                | 0          | 0          | 0                | 0              | 0     |
|                                | Total            | 299                            | 0          | 329        | 162     | 36         | 0          | 0          | 0                | 0          | 0          | 0                | 0              | 826   |
| LPJ-Guess simulation 2091-2100 | E. NL For.       | 106                            | 0          | 13         | 0       | 0          | 0          | 0          | 0                | 0          | 0          | 0                | 0              | 119   |
|                                | D. BL For.       | 0                              | 0          | 0          | 3       | 0          | 0          | 0          | 0                | 0          | 0          | 0                | 0              | 3     |
|                                | NL/BL For.       | 143                            | 0          | 108        | 15      | 1          | 0          | 0          | 0                | 0          | 0          | 0                | 0              | 267   |
|                                | M. For.          | 58                             | 0          | 180        | 101     | 14         | 0          | 0          | 0                | 0          | 0          | 0                | 0              | 353   |
|                                | BL/NL For.       | 11                             | 0          | 35         | 49      | 21         | 0          | 0          | 0                | 0          | 0          | 0                | 0              | 116   |
|                                | BL D. shr.       | 0                              | 0          | 0          | 0       | 0          | 0          | 0          | 0                | 0          | 0          | 0                | 0              | 0     |
|                                | NL e. shr.       | 0                              | 0          | 0          | 0       | 0          | 0          | 0          | 0                | 0          | 0          | 0                | 0              | 0     |
|                                | Prost. shr. tun. | 0                              | 0          | 0          | 0       | 0          | 0          | 0          | 0                | 0          | 0          | 0                | 0              | 0     |
|                                | Sedge tun.       | 0                              | 0          | 0          | 0       | 0          | 0          | 0          | 0                | 0          | 0          | 0                | 0              | 0     |
|                                | Shrub tun.       | 0                              | 0          | 0          | 0       | 0          | 0          | 0          | 0                | 0          | 0          | 0                | 0              | 0     |
|                                | Bare soil & rock | 0                              | 0          | 0          | 0       | 0          | 0          | 0          | 0                | 0          | 0          | 0                | 0              | 0     |
|                                | Perm. snow/ice   | 0                              | 0          | 0          | 0       | 0          | 0          | 0          | 0                | 0          | 0          | 0                | 0              | 0     |
|                                | Total            | 318                            | 0          | 336        | 168     | 36         | 0          | 0          | 0                | 0          | 0          | 0                | 0              | 858   |

## S8. Simulated potential reindeer consumption in Sweden by reindeer-herding communities

**Table S8.** Change in simulated potential reindeer consumption of leaf biomass ( $\text{g C m}^{-2} \text{yr}^{-1}$ ) in the 51 reindeer-herding communities in Sweden from the 1995-2004 period, for the different seasonal grazing grounds. The districts are sorted from north to south. Blue cells have a negative absolute change in the range  $-0.5$  to  $0 \text{ g C m}^{-2} \text{yr}^{-1}$  and red cells have a positive change from  $0$  to  $2.11 \text{ g C m}^{-2} \text{yr}^{-1}$ .

|                     | Spring    |           |           | Summer    |           |           | Autumn    |           |           | Winter    |           |           |
|---------------------|-----------|-----------|-----------|-----------|-----------|-----------|-----------|-----------|-----------|-----------|-----------|-----------|
|                     | 2013-2022 | 2041-2050 | 2091-2100 | 2013-2022 | 2041-2050 | 2091-2100 | 2013-2022 | 2041-2050 | 2091-2100 | 2013-2022 | 2041-2050 | 2091-2100 |
| Könkämä             | 0.52      | 0.78      | 0.80      | 0.54      | 0.90      | 1.12      | 0.26      | 0.46      | 0.15      | -0.15     | -0.19     | 0.11      |
| Lainiovuoma         | 0.56      | 0.80      | 0.58      | 0.56      | 0.86      | 0.70      | 0.15      | 0.36      | 0.14      | -0.12     | 0.08      | 0.46      |
| Saarivuoma          | 0.31      | 0.64      | 1.16      | 0.26      | 0.58      | 1.44      | 0.28      | 0.61      | 1.05      | -0.09     | 0.11      | 0.26      |
| Talma               | -0.03     | 0.13      | 0.22      | 0.27      | 0.66      | 0.93      | 0.15      | 0.44      | 0.64      | -0.09     | 0.00      | 0.17      |
| Gabna               | 0.26      | 0.52      | 0.67      | 0.19      | 0.47      | 2.07      | 0.26      | 0.52      | 0.67      | -0.16     | -0.02     | 0.37      |
| Laevas              | 0.58      | 0.88      | 0.77      | 0.14      | 0.33      | 2.11      | 0.40      | 0.66      | 0.68      | -0.09     | 0.02      | 0.47      |
| Girjas              | 0.33      | 0.56      | 0.65      | 0.39      | 0.65      | 1.43      | 0.31      | 0.53      | 0.36      | -0.10     | 0.02      | 0.50      |
| Baste cearru        | 0.23      | 0.53      | 0.46      | 0.17      | 0.58      | 1.75      | 0.17      | 0.42      | 0.43      | -0.04     | 0.11      | 0.25      |
| Unna Tjerusj        | 0.37      | 0.63      | 1.42      | 0.35      | 0.60      | 1.57      | 0.24      | 0.44      | 0.73      | 0.07      | 0.22      | 0.65      |
| Sirges              | 0.35      | 0.52      | 0.83      | 0.33      | 0.55      | 1.13      | 0.37      | 0.53      | 0.49      | 0.05      | 0.12      | 0.25      |
| Jåhkågaska tjiellde | 0.29      | 0.31      | 0.77      | 0.28      | 0.47      | 1.67      | 0.33      | 0.38      | 0.86      | 0.07      | 0.11      | 0.27      |
| Tuorpon             | 0.28      | 0.40      | 0.68      | 0.28      | 0.46      | 0.88      | 0.26      | 0.36      | 0.48      | 0.00      | 0.05      | 0.06      |
| Luokta-mávas        | 0.40      | 0.43      | 0.13      | 0.35      | 0.48      | 0.60      | 0.31      | 0.32      | 0.07      | -0.15     | -0.10     | -0.03     |
| Semisjaur-Njarg     | 0.44      | 0.54      | 0.38      | 0.43      | 0.61      | 0.89      | 0.35      | 0.43      | 0.37      | -0.05     | -0.07     | -0.50     |
| Svaipa              | 0.34      | 0.31      | 0.26      | 0.40      | 0.63      | 0.97      | 0.32      | 0.28      | 0.25      | -0.16     | -0.21     | -0.46     |
| Vittangi            | -0.13     | -0.07     | 0.25      | -0.14     | 0.03      | 0.31      | -0.06     | 0.15      | 0.41      | -0.08     | -0.06     | 0.48      |
| Gällivare           | -0.03     | 0.19      | 0.50      | -0.06     | 0.23      | 0.77      | -0.05     | 0.19      | 0.64      | -0.08     | 0.05      | -0.08     |
| Serri               | 0.27      | 0.65      | 0.46      | 0.07      | 0.33      | 0.51      | 0.07      | 0.33      | 0.51      | 0.09      | 0.26      | 0.25      |
| Udtja               | 0.06      | 0.02      | 0.26      | -0.01     | 0.08      | 0.00      | 0.03      | 0.12      | 0.08      | 0.01      | 0.05      | -0.34     |
| Ståkke              | -0.06     | -0.10     | 0.24      | -0.06     | -0.10     | 0.24      | -0.06     | -0.10     | 0.25      | -0.10     | -0.10     | 0.08      |
| Maskaure            | -0.05     | -0.08     | 0.82      | -0.03     | -0.20     | 0.53      | -0.14     | -0.25     | 0.36      | -0.13     | -0.31     | -0.02     |
| Östra kikkejaure    | -0.06     | 0.14      | 0.57      | -0.05     | 0.13      | 0.71      | -0.06     | 0.14      | 0.57      | -0.07     | 0.11      | 0.18      |
| Västra kikkejaure   | -0.13     | -0.08     | 0.57      | -0.13     | -0.08     | 0.57      | -0.12     | -0.06     | 0.61      | -0.22     | -0.16     | -0.46     |
| Mausjaure           | -0.08     | 0.03      | 0.83      | -0.08     | 0.03      | 0.83      | -0.16     | 0.06      | 0.18      | -0.19     | -0.18     | -0.35     |
| Muonio              | -0.09     | 0.08      | 0.46      | -0.09     | 0.08      | 0.46      | -0.13     | -0.03     | 0.48      | -0.06     | -0.03     | 0.43      |
| Sattajärvi          | -0.15     | 0.11      | 0.42      | -0.12     | 0.13      | 0.36      | -0.10     | 0.15      | 0.46      | 0.08      | 0.29      | 0.66      |
| Tärendö             | 0.00      | 0.00      | 0.00      | -0.06     | 0.13      | 0.75      | 0.02      | 0.20      | 0.71      | -0.02     | 0.16      | 0.52      |
| Kalix               | -0.04     | -0.02     | -0.15     | -0.04     | -0.02     | -0.15     | -0.04     | -0.02     | -0.15     | -0.13     | -0.11     | -0.49     |
| Pirttijärvi         | -0.02     | 0.23      | 0.35      | -0.02     | 0.23      | 0.35      | -0.06     | 0.09      | 0.10      | -0.09     | 0.01      | -0.18     |
| Liehattjä           | -0.33     | 0.13      | -0.64     | -0.10     | -0.14     | -0.16     | -0.09     | -0.07     | -0.20     | -0.27     | -0.35     | -0.46     |
| Ängeså              | -0.13     | 0.23      | 0.39      | 0.07      | 0.36      | 0.59      | 0.01      | 0.21      | 0.19      | -0.07     | 0.11      | 0.14      |
| Korju               | 0.01      | 0.07      | 0.14      | 0.01      | 0.07      | 0.14      | 0.01      | 0.07      | 0.14      | -0.13     | -0.15     | -0.26     |

|                  |       |       |       |       |       |       |       |       |       |       |       |       |
|------------------|-------|-------|-------|-------|-------|-------|-------|-------|-------|-------|-------|-------|
| Vilhelmina south | 0.16  | 0.17  | 0.15  | 0.49  | 0.58  | 0.32  | 0.32  | 0.33  | 0.24  | -0.17 | -0.26 | -0.45 |
| Vilhelmina north | 0.20  | 0.15  | 0.23  | 0.43  | 0.59  | 0.23  | 0.24  | 0.23  | 0.21  | -0.17 | -0.33 | -0.48 |
| Ubmeje tjeälddie | 0.31  | 0.38  | 0.40  | 0.43  | 0.61  | 0.71  | 0.40  | 0.47  | 0.39  | -0.12 | -0.11 | -0.25 |
| Vapsten          | 0.28  | 0.32  | 0.27  | 0.28  | 0.32  | 0.27  | 0.27  | 0.32  | 0.27  | 0.04  | 0.06  | 0.06  |
| Ran              | 0.43  | 0.56  | 0.48  | 0.57  | 0.88  | 0.67  | 0.45  | 0.58  | 0.45  | -0.21 | -0.24 | -0.47 |
| Gran             | 0.47  | 0.58  | 0.49  | 0.59  | 0.80  | 0.83  | 0.49  | 0.67  | 0.79  | -0.10 | -0.17 | -0.41 |
| Malå             | -0.05 | 0.10  | 0.11  | -0.07 | 0.09  | 0.17  | -0.07 | 0.08  | 0.19  | -0.18 | -0.23 | -0.40 |
| Voernese         | 0.44  | 0.50  | 0.44  | 0.48  | 0.55  | 0.35  | 0.46  | 0.48  | 0.25  | -0.11 | -0.23 | -0.37 |
| Ohredahke        | 0.38  | 0.26  | 0.30  | 0.38  | 0.26  | 0.27  | 0.38  | 0.26  | 0.30  | -0.12 | -0.17 | -0.35 |
| Raedtievaerie    | 0.11  | 0.01  | 0.25  | 0.42  | 0.34  | -0.09 | 0.38  | 0.29  | -0.09 | -0.22 | -0.16 | -0.34 |
| Jiingevaerie     | 0.33  | 0.49  | 0.26  | 0.38  | 0.74  | 0.55  | 0.19  | 0.11  | 0.19  | -0.14 | -0.13 | -0.30 |
| Jovnevaerie      | -0.15 | -0.11 | -0.23 | 0.35  | 0.35  | 0.20  | 0.19  | 0.16  | 0.23  | -0.21 | -0.17 | -0.31 |
| Njaarke          | 0.42  | 0.24  | 0.13  | 0.42  | 0.24  | 0.13  | 0.31  | 0.09  | 0.10  | -0.06 | -0.03 | -0.04 |
| Kall             | 0.23  | 0.08  | 0.52  | 0.23  | 0.08  | 0.52  | 0.20  | -0.04 | 0.47  | -0.02 | -0.06 | 0.31  |
| Handölsdalen     | 0.32  | 0.61  | 0.27  | 0.50  | 0.85  | 0.39  | 0.40  | 0.68  | 0.35  | 0.00  | -0.01 | -0.03 |
| Tåssåsen         | -0.01 | 0.31  | -0.13 | -0.04 | 0.31  | -0.12 | -0.11 | 0.26  | -0.24 | -0.17 | -0.09 | -0.05 |
| Mittådalen       | 0.19  | 0.49  | -0.01 | 0.38  | 0.82  | 0.28  | -0.25 | -0.11 | -0.04 | -0.15 | -0.12 | -0.01 |
| Ruvhten sijte    | -0.10 | 0.02  | -0.18 | 0.26  | 0.60  | -0.40 | -0.15 | -0.08 | -0.08 | -0.23 | -0.40 | -0.15 |
| Idre             | -0.10 | -0.09 | -0.14 | -0.10 | -0.09 | -0.13 | -0.04 | -0.04 | -0.30 | -0.13 | -0.14 | 0.03  |
